# Supplementary material
Source: Springer Nature journal article supplement (https://www.springermedizin.de/resource/supplementary/12936_2013_2847_MOESM1_ESM.pdf/9544436)

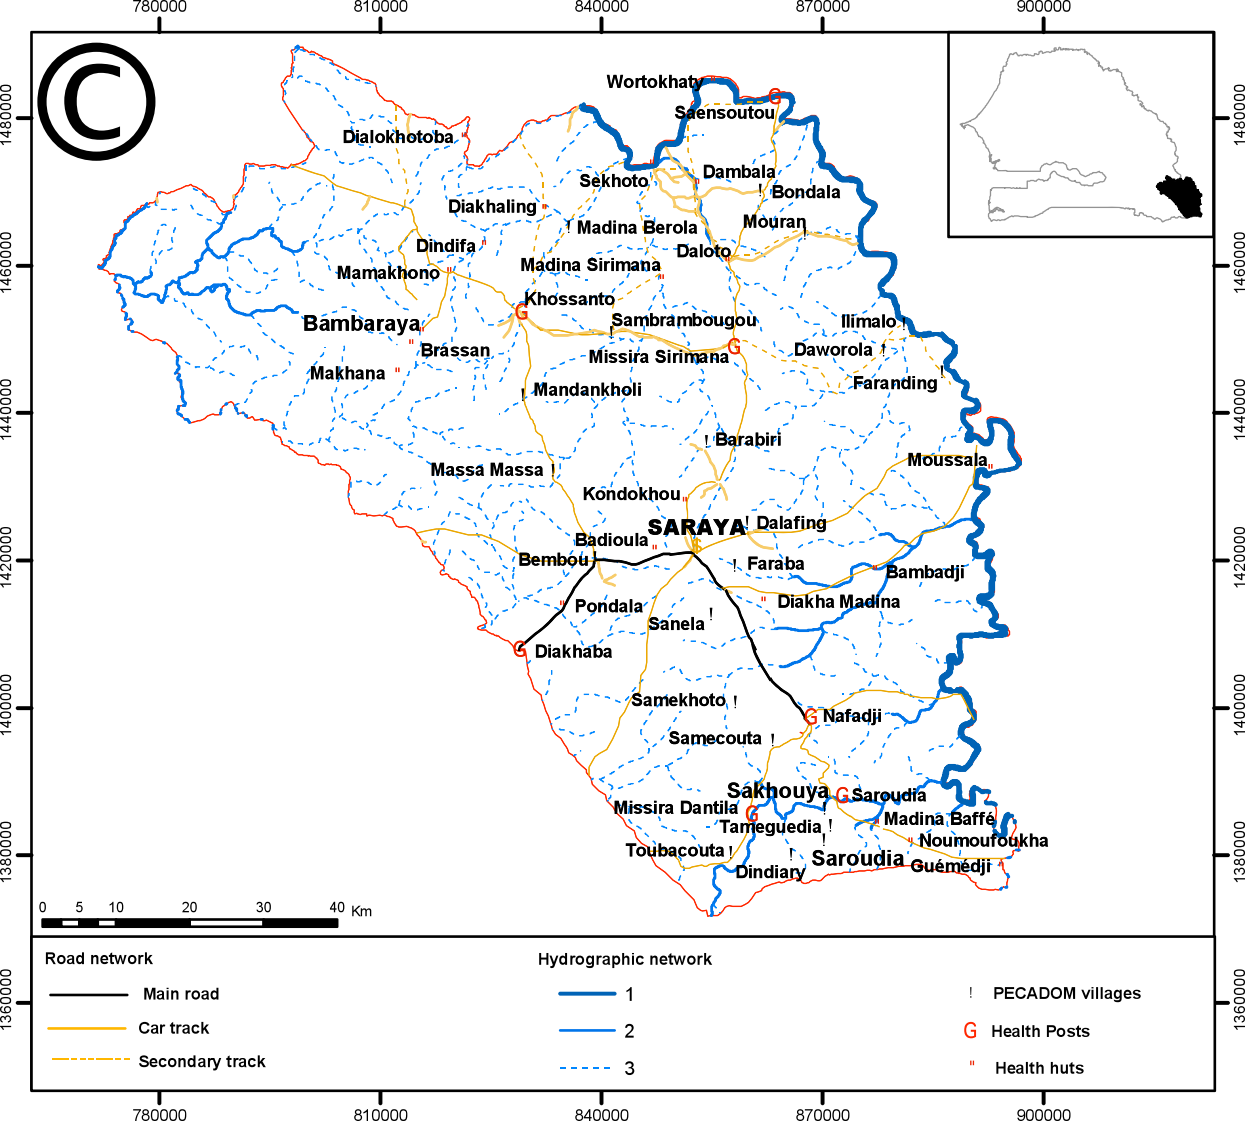

Supplement: MOESM1 [file 9544436]
